# Supplementary material
Source: publisher figshare collection journal article supplement (https://acs.figshare.com/ndownloader/files/3884248)
Supplement: Supplementary file 1 [file 3884248]

## Supporting Information

### 1. Pore size distribution and effective pore radii

- Calculation of pore radii distribution uses following assumptions: (i) pores are straight and cylindrical, (ii) all of the pores have identical length and (iii) pores in the membrane may have different radii.
- Pore radii are distributed within interval  $R_{\min} < R < R_{\max}$ . The smallest pore radii is defined as  $R_{\min} = 2r_w$  while the biggest pore radii was  $R_{\max} = 100 r_w$ , where  $r_w$  was the radii of a single water molecule, 0.083 nm respectively. Initially a grid of pores with  $M$  intervals is defined within interval  $R_{\min} < R < R_{\max}$ . Then the pore radii in the grid may be defined as  $R_i - \Delta/2 \leq R \leq R_i + \Delta/2$ , where  $i = 0, 1, 2, \dots, M$ ,  $\Delta = (R_{\max} - R_{\min})/M$  and  $R_i = R_{\min} + (i+1/2) \Delta$ .
- Flux of the solution through the membrane is additive value meaning the total flux of the solution is the sum of the particular fluxes occurring through  $N_i$  pores of  $R_i$  radii. Using SFPF model particular flux  $q_{p,i} \equiv q_p(R_i)$  through particular pore of pore radii  $R_i$ , may be calculated. Here  $q_{p,i}$  has the dimension of  $\text{kg m}^{-2} \text{s}^{-1}$ . Since the molar fraction of organic solutes in the feed solution (at the entrance of the pore) was negligible, below 0.0004, and 1 kg of pure deionized water occupies  $1 \text{ dm}^3$ ,  $q_{p,i}$  may be expressed as particular volume flux through the particular pore of radius  $R_i$ ,  $J_{v p,i} = 0.001 q_{p,i} [\text{m}^3 \text{m}^{-2} \text{s}^{-1}]$ . Then the total volume flux of the solution may be represented as:

$$J_{v,\text{theor}} = \sum_i N_i J_{v p,i} \quad \text{A(1),}$$

where  $N_i$  is the total number of pores.

- Using SFPF model the rejection of solute  $f_i \equiv f(R_i)$  by a particular pore may be calculated. Rejection is not an additive value but the product of rejection and particular volume flux  $J_{v p,i}$  is:

$$J_{v,\text{theor}} f_{\text{theor}} = \sum_i N_i J_{v p,i} f_i \quad \text{A(2)}$$

- The values of total  $J_v$  and  $f$  may be determined experimentally. Their values will depend on the sizes of the solutes, i.e. their Stokes radius. It means that the corresponding microvalues of  $J_{v p,i}$  and  $f_i$  will depend on the type of the solutes used. Therefore, new functions are defined,  $J_{v p,i,J} \equiv J_{v p,J}(R_i)$  i  $f_{i,J} \equiv f_J(R_i)$ .

$J_{v p,i,J}$  and  $f_{i,J}$  in A(4) were calculated using SFPF model developed by Sourirajan and Matsuura. Six ( $N_S = 6$ ) different organic solutes were used in this study, namely:

trimethylene oxide, 1-3-dioxolane, 1,4-dioxane, 12-crown-4, 15-crown-5 and 18-crown-6. The algorithm was written in Fortran and may be described in steps.

**1.** Stokes radius was calculated from diffusivity of solute ( $D_{AW}$ ) in water at infinite dilution using  $r_{St} = k_B T / (6\pi\eta D_{AW})$  where  $T = 298$  K,  $\eta = 0.001$  Pa s and  $k_B$  is the Boltzmann constant. Diffusivities of solutes used in the procedure are summarized in (Emil Dražević, Krešimir Košutić, Vladimir Dananić, *Mass transfer of differently sized organic solutes at spacer covered and permeable nanofiltration wall*, Chem. Eng. J., **2014**, 244, 152-159).

**2.** Parameter  $B_J$  is a measure of solute – membrane interaction and it was taken  $B_J = 0$ , i.e. it was assumed that there are no Van der Waals forces between these polar solutes and the pore wall.

**3.** A grid of pore radii was defined, as explained above

$$R \equiv R_i = R_{\min} + i \frac{R_{\max} - R_{\min}}{M} \quad i = 0, 1, \dots, M \quad A(3),$$

where  $M = 1000$ .

**4.** The procedure began with the solute having smallest Stokes radius using  $R_i$  to calculate each  $\varphi_i$ .

$$\varphi_i = \frac{R_s[m]}{R_i + r_w[m]} \quad A(4)$$

$\varphi_i$  was used to calculate  $b(\varphi_i)$ , frictional function for a grid of pores:

$$b(\varphi_i) \equiv K_c = \frac{(1 - \varphi_i)^2 [2 - (1 - \varphi_i)^2] K_s}{2K_t} \quad A(5)$$

$$K_t = \frac{9}{4} \pi^2 \sqrt{2} (1 - \varphi_i)^{-5/2} \left( 1 + \sum_{n=1}^2 a_n (1 - \varphi_i)^n \right) + \sum_{n=0}^4 a_{n+3} \varphi_i^n$$

$$K_s = \frac{9}{4} \pi^2 \sqrt{2} (1 - \varphi_i)^{-5/2} \left( 1 + \sum_{n=1}^2 b_n (1 - \varphi_i)^n \right) + \sum_{n=0}^4 b_{n+3} \varphi_i^n,$$

where  $a_1 = -1.2167$ ,  $a_2 = 1.5336$ ,  $a_3 = -22.5083$ ,  $a_4 = -5.6117$ ,  $a_5 = -0.3363$ ,  $a_6 = -1.2160$ ,  $a_7 = 1.6470$ ,  $b_1 = 0.1167$ ,  $b_2 = -0.0442$ ,  $b_3 = 4.018$ ,  $b_4 = -3.9788$ ,  $b_5 = -1.9215$ ,  $b_6 = 4.392$  and  $b_7 = 5.006$ .

**5.** Value of  $C_{p,i}$  was assumed in order to calculate  $C_{m,i}$  from:

$$C_m = C_p + (C_f - C_p) \exp(J_v / k) \quad A(6)$$

where  $k$  was determined from Sherwood relation for non-permeable wall as explained in (Emil Dražević, Krešimir Košutić, Vladimir Dananić, *Mass transfer of differently sized organic solutes at spacer covered and permeable nanofiltration wall*, Chem. Eng. J., **2014**, 244, 152-159) and  $J_v$  is the experimental solution volume flux.

**6.** Using the data on operating pressure and  $C_m$ , dimensionless parameters  $\beta_{1,i}$  and  $\beta_{2,i}$  were calculated using following equations:

$$\beta_{1,i} = \eta / (X_{AW} R_i^2 C_m) \quad A(7)$$

$$\beta_{2,i} = \Delta P / (R_g T C_m) \quad A(8)$$

where  $X_{AW} = R_g T / D_{AW}$  and  $R_g$  is the gas constant.

**7.** Data on  $R_{S,i}$ ,  $b_i(\varphi)$ ,  $\beta_{1,i}$  and  $\beta_{2,i}$  are loaded. Dimensionless radius  $\rho = r/R_i$  and dimensionless concentration  $C_A = C_p/C_m$  are used to calculate the solvent velocity profile in each pore  $R_i$  solving the equation:

$$\frac{d^2 \alpha(\rho)}{d\rho^2} + \frac{1}{\rho} \frac{d\alpha(\rho)}{d\rho} + \frac{\beta_2}{\beta_1} - \frac{(b(\varphi_i) - 1)\alpha(\rho)C_A(\rho)}{\beta_1} = 0 \quad A(9)$$

Equation A(9) is solved with boundary conditions,  $\rho = 0 \rightarrow d\alpha(\rho)/d(\rho) = 0$ , and  $\rho = 1 \rightarrow \alpha(\rho) = 0$ .

**8.**  $\alpha_i(\rho)$  from step 7. is used to calculate  $f_{m,i}$  in the following equation.

$$f_{m,i} = 1 - \frac{\int_0^1 \left\{ \exp(\alpha_i(\rho)) / [1 + b(\varphi_i)(\exp(\alpha_i(\rho)) - 1)] \right\} \alpha_i(\rho) \rho d\rho}{\int_0^1 \alpha_i(\rho) \rho d\rho} \quad A(10)$$

**9.**  $C_p$  was then calculated from  $f_m = 1 - C_p / C_m$  where  $f_m$  A(10). If  $C_p$  agrees with the assumed  $C_p$  from the Step 5. then the algorithm finishes, and if not, it returns to step 5. and repeats the procedure until this condition is satisfied.

**10.** Find the distribution  $Y(R_i)$  for which  $S$  has the minimum value:

$$S = \sum_{J=1}^{N_s} \left( f_{J,\text{exp}} - \frac{\sum_{i=1}^M f_J(R_i) J_{vp,i,J}(R_i) Y(R_i)}{\sum_{i=1}^M J_{vp,i,J}(R_i) Y(R_i)} \right)^2 \quad (\text{A11})$$

A(11) has  $M$  fitting parameters. The  $f_{(J)\text{exp}}$  is the measured rejection of marker  $J$ . Minimum of A(11) is found using the gradient method under constraint  $N(R_i) \geq 0$  and  $Y(R_i) > 0$ , for each  $i$ .  $Y(R_i)$  in A(11) is defined as  $Y(R_i) = N_i/N_{\text{total}}/\Delta R_i$ . The procedure assumes no pore size distribution, it find most probable  $Y_i$  of pore radii  $R_i$  which give the minimum of  $S$  for all solutes involved.

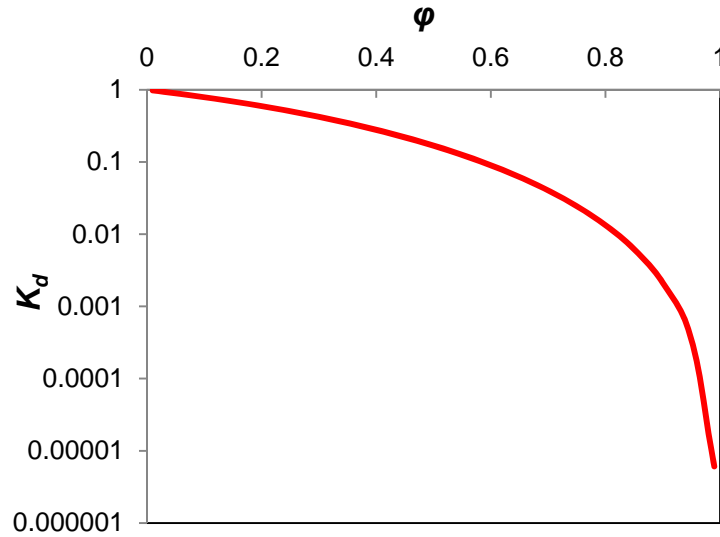

**Figure S1.** Diffusion hindrance,  $K_d$ , represented by Eq. (5). It is valid in range  $0 < \varphi < 1$ .

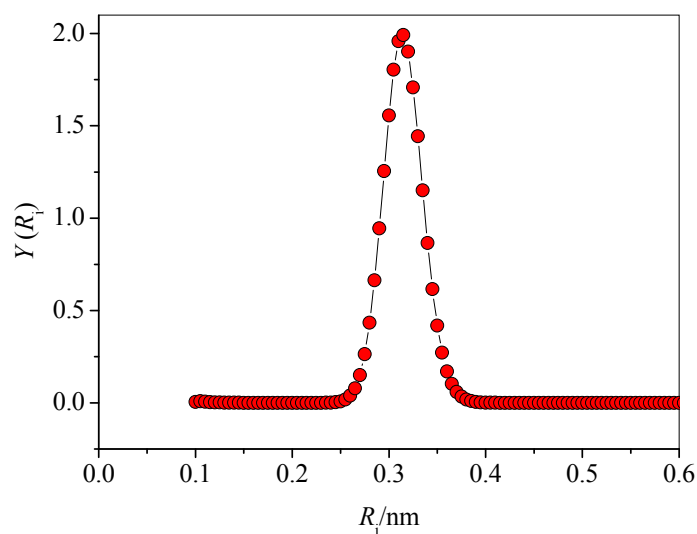

**Figure S2.** Log normal like pore size distribution of SWC4+ membrane calculated from rejection of 6 model solutes using above described numerical procedure.

**Table S1.** Bulk diffusion coefficients and Stokes radii of the organic solutes tested

| Organic solute  | $M/\text{g mol}^{-1}$ | $R_S/\text{nm}^*$ | $D_\infty/10^{-10}\text{ m}^2\text{s}^{-1}^*$ | $\nu/\text{cm}^{-1}^{**}$ | Interval/ $\text{cm}^{-1}^{***}$ |
|-----------------|-----------------------|-------------------|-----------------------------------------------|---------------------------|----------------------------------|
| Ethylene glycol | 62.07                 | 0.198             | 11.02                                         | 1043                      | 1000-1060                        |
| Glycerol        | 92.09                 | 0.217             | 10.05                                         | 1044                      | 1010-1080                        |
| 1 - butanol     | 74.12                 | 0.239             | 9.128                                         | 1070                      | 1050-1090                        |
| 1 - pentanol    | 88.15                 | 0.261             | 8.359                                         | 1053                      | 1040-1070                        |
| Benzyl alcohol  | 108.14                | 0.273             | 7.992                                         | 1006                      | 960-1060                         |

\* Data on Stokes radii,  $R_S$ , and bulk diffusivities,  $D_\infty$ , are taken From Ben-David *et al.*<sup>45</sup>

\*\* IR band of specific solute used to estimate diffusion coefficient. \*\*\* Integration interval and baseline of band area.

**Table S2.** The difference in experimental ( $f$ ) and theoretical ( $f_{\text{theor}}$ ) values of rejection. Theoretical values were found using pore size distribution in Fig. S2.

| Organic solute     | $f$   | $f_{\text{theor}}$ |
|--------------------|-------|--------------------|
| trimethylene oxide | 0.529 | 0.580              |
| 1,3-dioxolane      | 0.706 | 0.709              |
| 1,4-dioxane        | 0.951 | 0.785              |
| 12-crown-4         | 0.974 | 0.986              |
| 15-crown-5         | 0.974 | 0.986              |
| 18-crown-6         | 0.975 | 0.986              |

## 2. ATR-FTIR data and corresponding fitting examples

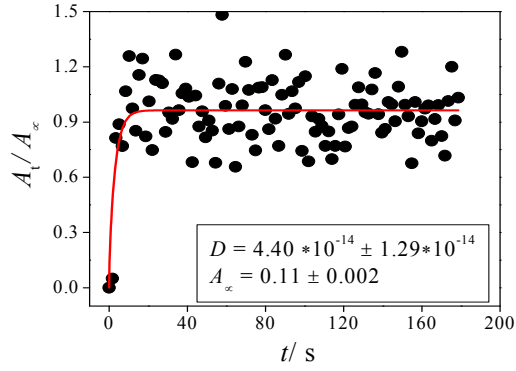

A

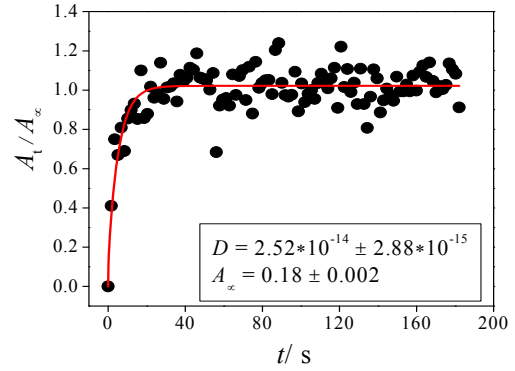

B

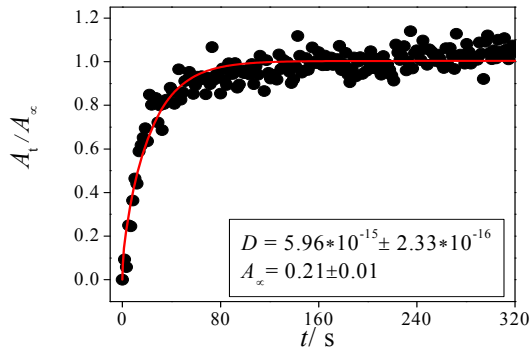

C

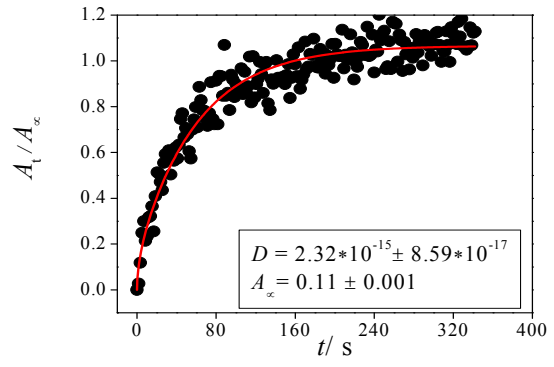

D

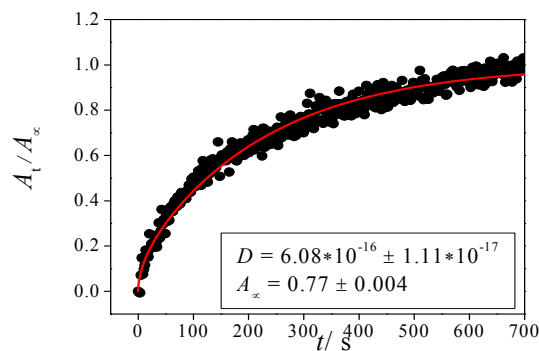

E

**Figure S3.** Experimental results on  $A(t)$  and  $t$  used to estimate diffusion coefficients using hydrated stack of five SWC4+ layers. Red lines represent curve obtained from the two parameter fit of Eq. (2) to the experimental data. Black points represent different solutes i.e. surfaces under targeted bands; A) ethylene glycol; B) glycerol; C) 1 – butanol; D) 1 – pentanol; E) benzyl alcohol.

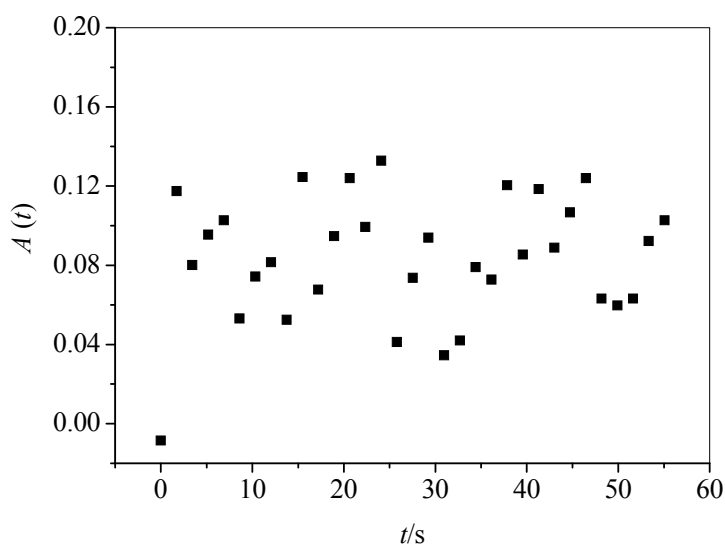

**Figure S4.** Band area of benzyl alcohol measured with a bare (without a film) crystal exposed to the same solution as with the film. The band area of benzyl alcohol with a polyamide film was about seven times higher (Figure S3E).
